# Supplementary material for: A Two-Stage Process for Differentiation of Wharton’s Jelly-Derived Mesenchymal Stem Cells into Neuronal-like Cells
Source: Hindawi journal article supplement (doi:10.1155/2021/6631651), 2021-05-28

# Supplementary Figure 1

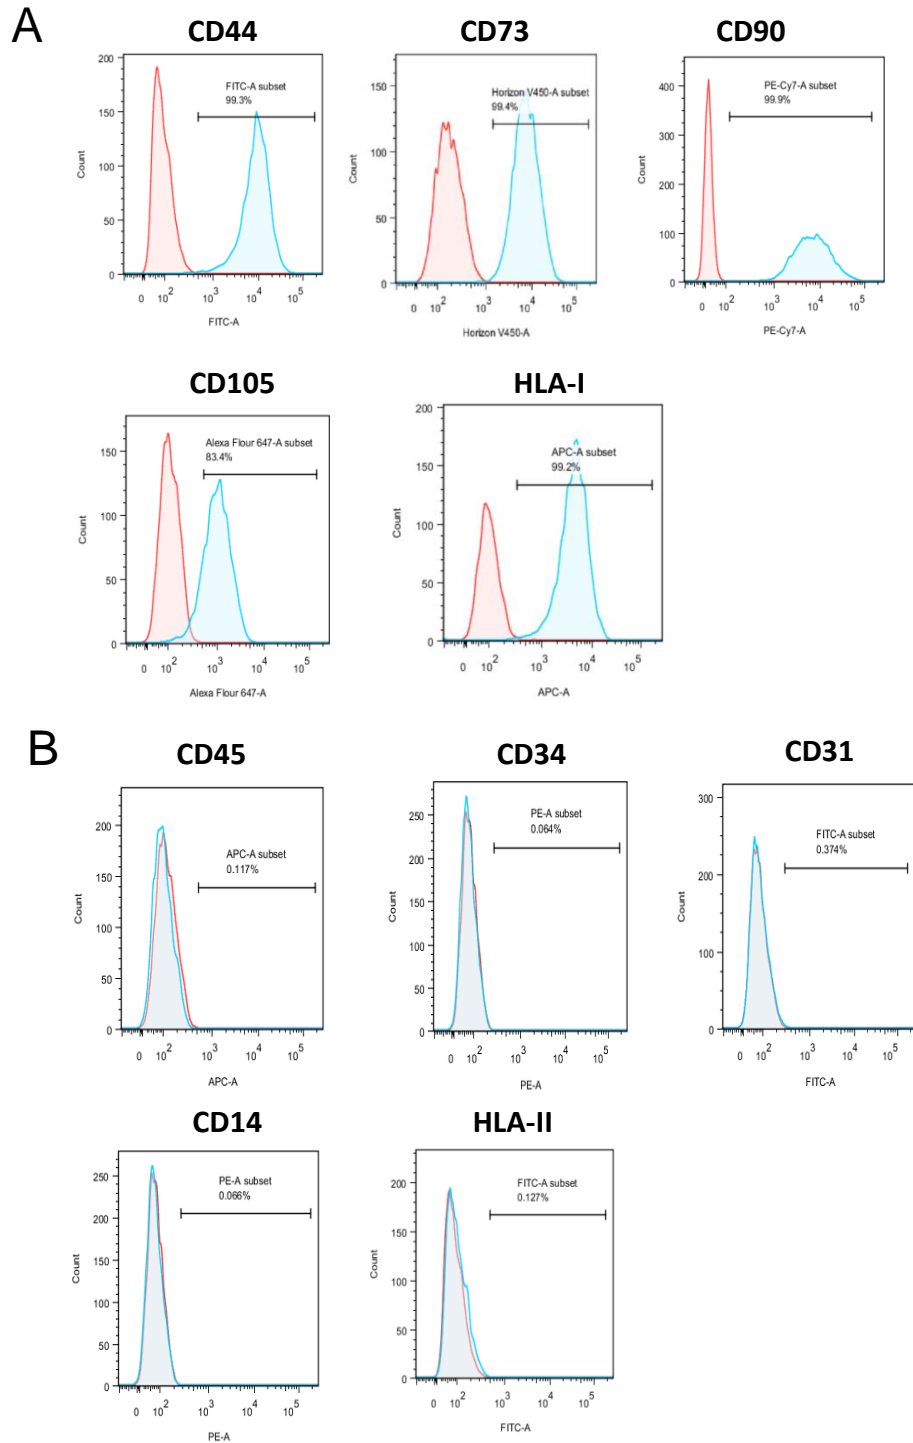

# Supplementary Figure 1

C

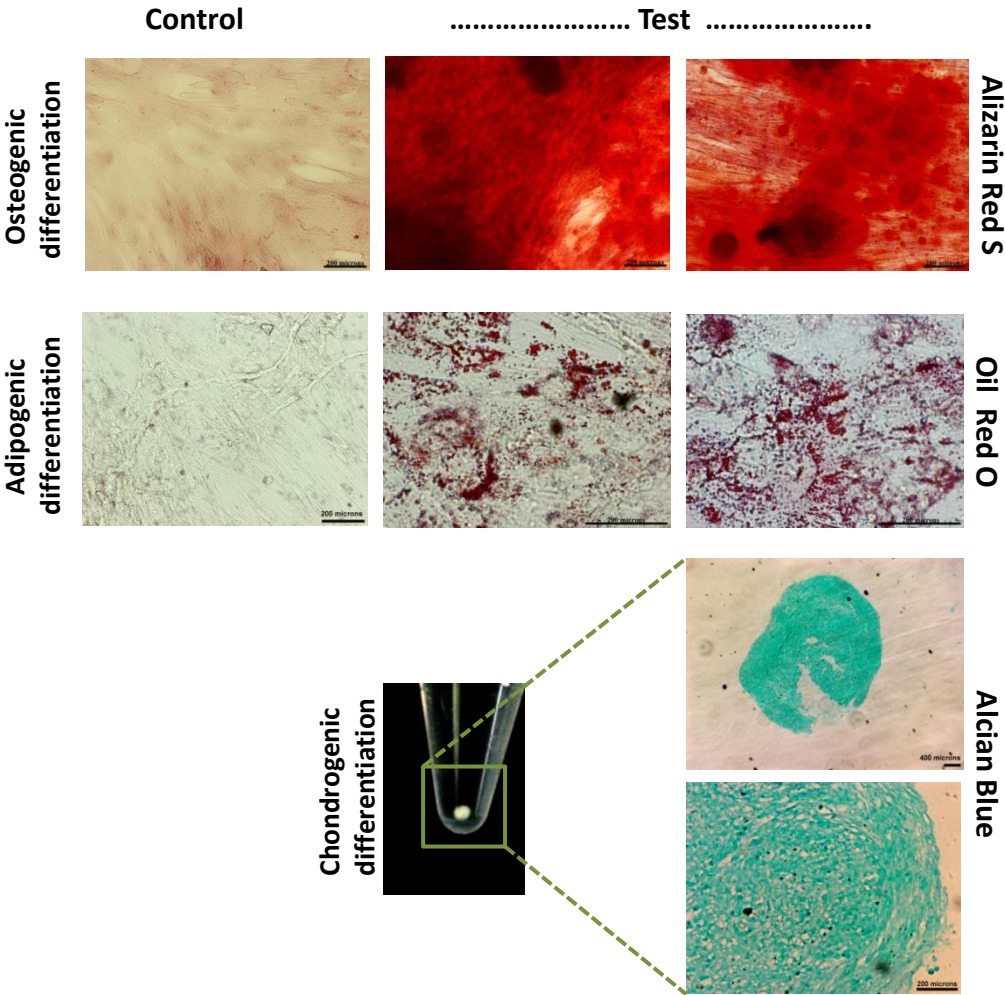

## Supplementary Figure 2

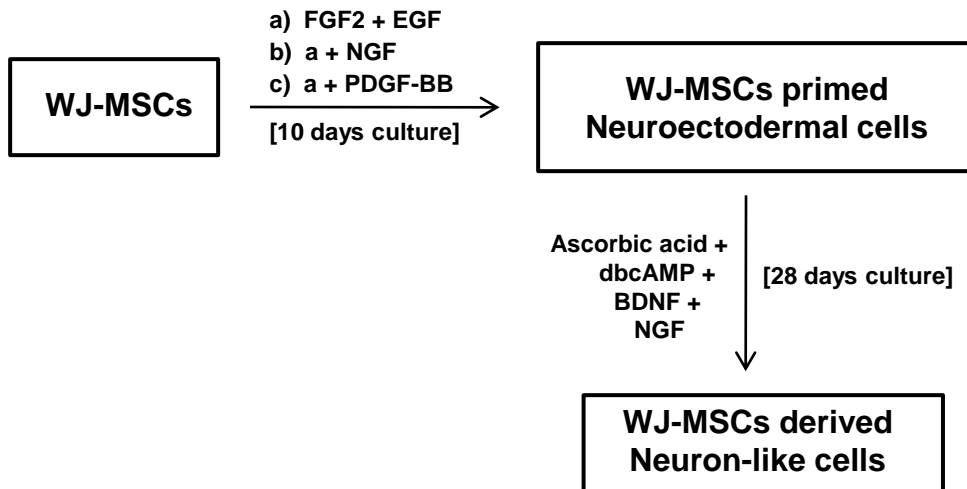

# Supplementary Figure 3

..... WJ-MSCs .....

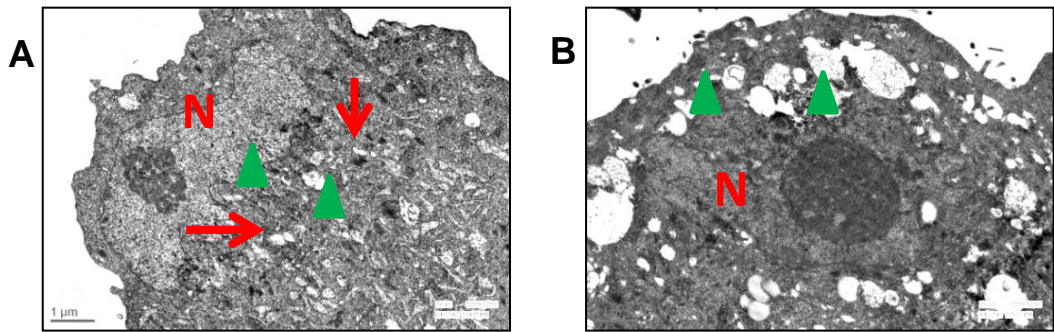

..... WJ-MSCs primed Neuroectodermal cell .....

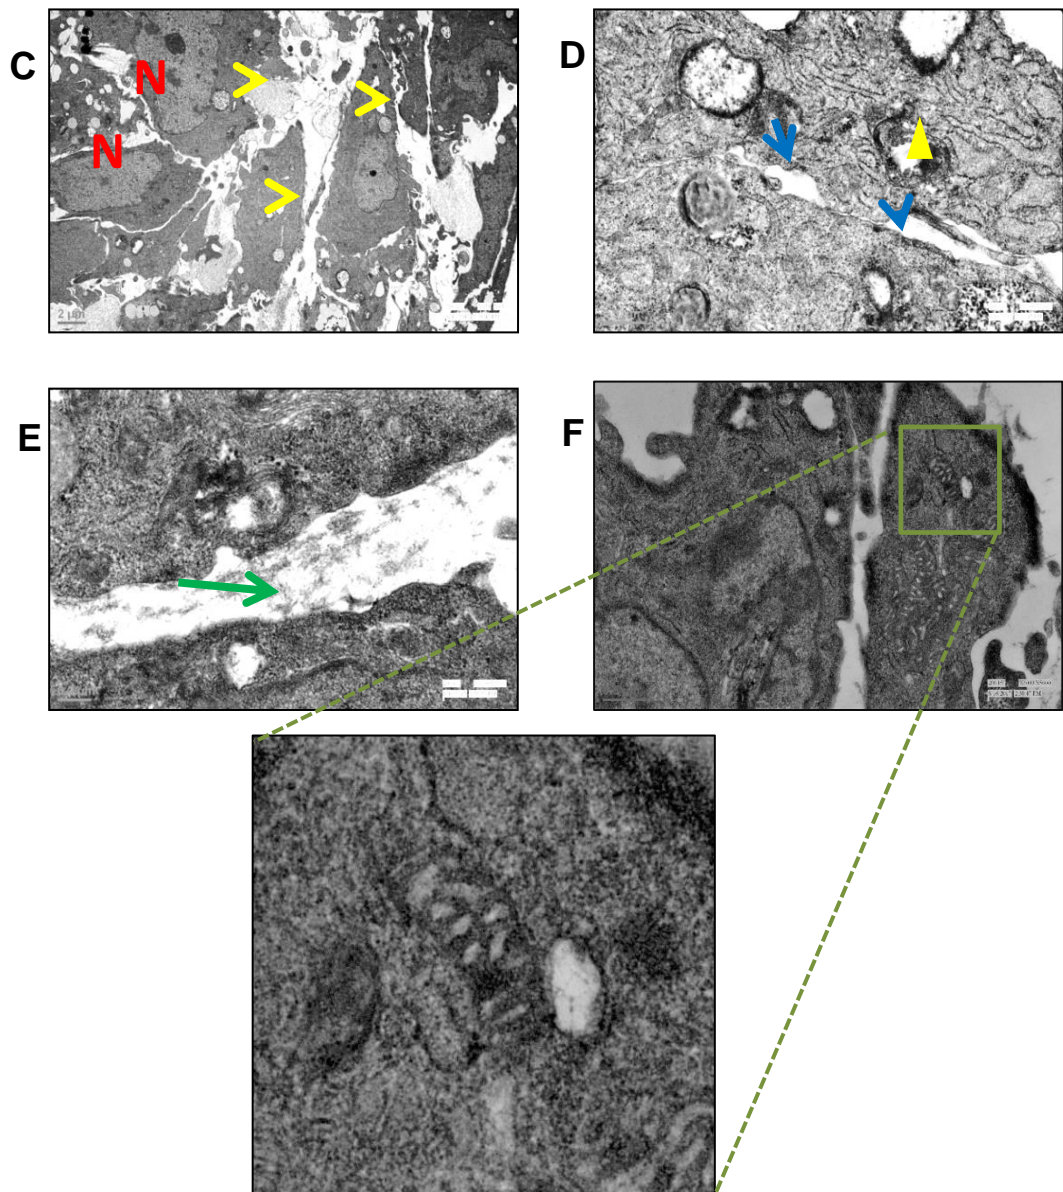

## Supplementary Figure 4

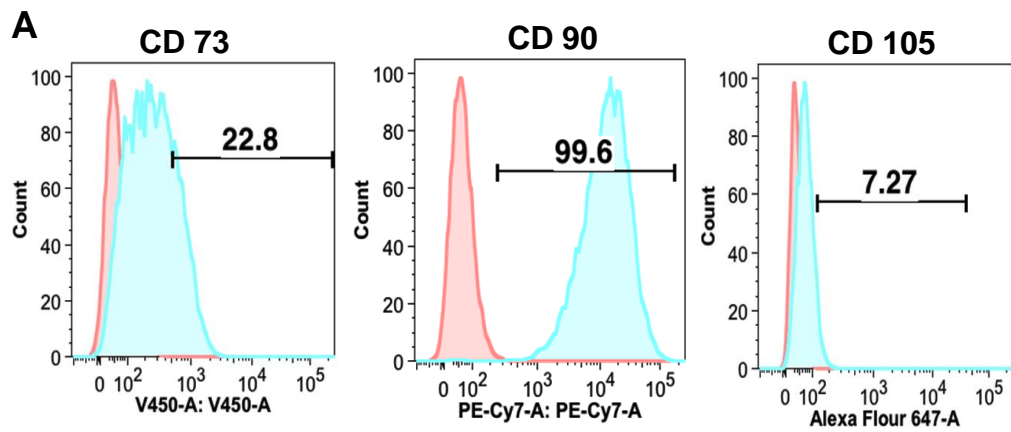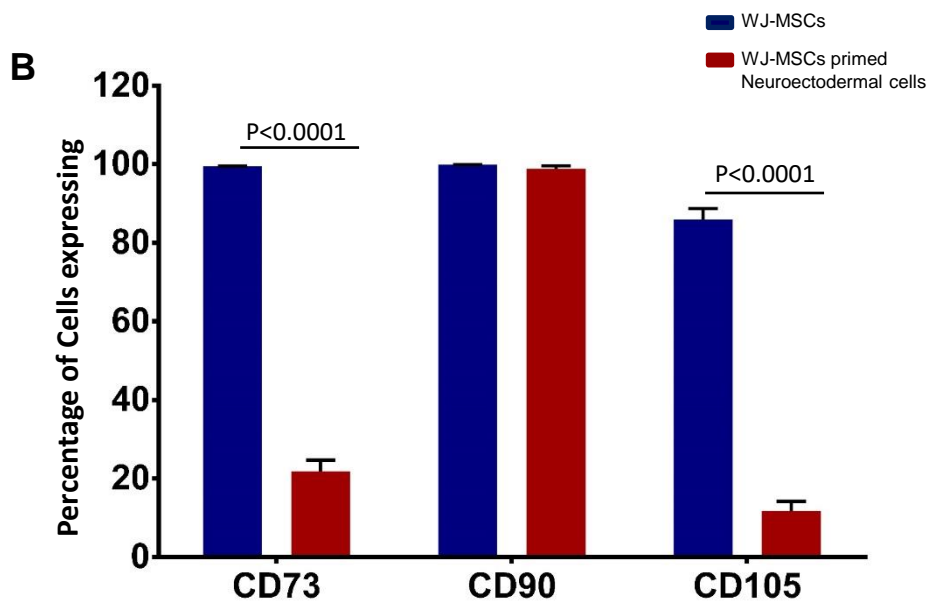

Supplement: f1 [file 6631651.f1.zip]
