# Supplementary material for: A Two-Stage Process for Differentiation of Wharton's Jelly-Derived Mesenchymal Stem Cells into Neuronal-like Cells
Source: Stem Cells Int. 2021 May 28;2021:6631651. doi: 10.1155/2021/6631651 (PMC8177978; doi:10.1155/2021/6631651)
Supplement: Supplementary Materials — Table S1: list of antibodies for flow cytometry, catalogue numbers, and sources. Table S2: list of antibodies for immunocytochemistry, catalogue numbers, and sources. Table S3: list of primers, their sequences, and amplicon sizes. [file 6631651.f1.zip]

Archive with 4 entries (4 files):
- Suppl Figures-converted (2).pdf
- Table S1.docx
- Table S2.docx
- Table S3.docx
